# Supplementary material for: A New Topical Candidate in Acne Treatment: Characterization of the Meclozine Hydrochloride as an Anti-Inflammatory Compound from In Vitro to a Preliminary Clinical Study
Source: Biomedicines. 2022 Apr 19;10(5):931. doi: 10.3390/biomedicines10050931 (PMC9138413; doi:10.3390/biomedicines10050931)
Supplement: Supplementary file 1 [file biomedicines-10-00931-s001.zip › biomedicines-1668422-supplementary.pdf]

## SUPPLEMENTAL MATERIALS

**Toxicological evaluation of meclozine.** Before performing clinical evaluation of meclozine, reglementary toxicological tests were realized under the cosmetic standards requirements. Bacterial reverse mutation assay (Ames test), ocular irritation test (HET CAM), cutaneous irritation test (SkinEthic), skin sensitization tests (KeratinoSens™ and Direct Peptide Reactivity Assay) and phototoxicity test (3T3 NRU) were performed and are available in Supplemental information (IDEA Lab, Martillac, France). These studies concluded that meclozine gel was ocular irritant, not mutagenic, not pro-mutagenic, not skin irritant, not skin sensitizer and not phototoxic. Then, assessment, under dermatological control, of skin compatibility after single application in a 48 consecutive hours semi-occlusive patch-test on 10 volunteers concluded that 1% meclozine gel was non-irritant.

## TABLES AND FIGURES

### TABLE

**Supplementary Table S1:** Pre-clinical toxicological assay<sup>a</sup> on meclozine

| Toxicity test                          | Nature                                                                       | Concentration (µg/ml) | Result                             |
|----------------------------------------|------------------------------------------------------------------------------|-----------------------|------------------------------------|
| HET-CAM test                           | Evaluation of ocular irritant potential                                      | Pure                  | Classified as irritant             |
| 3T3 NRU                                | <i>In vitro</i> phototoxicity (OCDE 432 guideline)                           | 7.81 - 1000           | Classified as not phototoxic       |
| Bacterial reverse mutation assay       | Determination of the mutagenic activity (Ames test) (OCDE guideline 471)     | 19.2 - 1923           | Not mutagenic<br>Not pro-mutagenic |
| Keratinosens                           | <i>In vitro</i> sensitization on keratinocytes                               | 1 - 1000              | Classified as not skin sensitizer  |
| Direct Peptide Reactivity Assay (DPRA) | <i>In chemico</i> skin sensitization (OCDE 442C guideline)                   | 10000                 | Negative prediction                |
| Cutaneous irritation                   | <i>In vitro</i> cutaneous irritation on SkinEthic model (OCDE 439 guideline) | Pure                  | Meclozine must not be classified   |

<sup>a</sup>Assays performed by the IDEA Compagny

**Supplementary Table S2:** Cutaneous compatibility test<sup>a</sup> of meclozine

| <b>Nb of<br/>volunteers<br/>included</b> | <b>Sex</b> | <b>Age</b> | <b>In-situ<br/>reaction of<br/>product</b> | <b>Individual<br/>score of<br/>product</b> | <b>In situ<br/>reaction on<br/>Control site 1</b> | <b>In situ<br/>reaction on<br/>Control site 2</b> |
|------------------------------------------|------------|------------|--------------------------------------------|--------------------------------------------|---------------------------------------------------|---------------------------------------------------|
| 1                                        | F          | 60         | none                                       | 0.00                                       | none                                              | none                                              |
| 2                                        | M          | 62         | none                                       | 0.00                                       | none                                              | none                                              |
| 3                                        | M          | 52         | none                                       | 0.00                                       | none                                              | none                                              |
| 4                                        | F          | 44         | none                                       | 0.00                                       | none                                              | none                                              |
| 5                                        | F          | 65         | none                                       | 0.00                                       | none                                              | none                                              |
| 6                                        | F          | 62         | none                                       | 0.00                                       | none                                              | none                                              |
| 7                                        | F          | 65         | none                                       | 0.00                                       | none                                              | none                                              |
| 8                                        | F          | 62         | none                                       | 0.00                                       | none                                              | none                                              |
| 9                                        | F          | 52         | none                                       | 0.00                                       | none                                              | none                                              |
| 10                                       | F          | 6          | none                                       | 0.00                                       | none                                              | none                                              |

<sup>a</sup>Assays performed by the IDEA Compagny

**Supplementary Table S3:** Lesion count in volunteers during the 12-weeks study

| Patient<br>number <sup>c</sup> | Treated group <sup>a</sup> |                          | Control group <sup>b</sup> |              |
|--------------------------------|----------------------------|--------------------------|----------------------------|--------------|
|                                | Baseline                   | Week 12                  | Baseline                   | Week 12      |
|                                | ASI <sup>d</sup>           | ASI                      | ASI                        | ASI          |
| 1                              | 19.00                      | 12.00                    | 35.25                      | 19.75        |
| 2                              | 46.25                      | 35.75                    | 5.50                       | <b>5.50</b>  |
| 3                              | 15.00                      | 9.50                     | 15.00                      | <b>15.00</b> |
| 4                              | 24.00                      | 16.25                    | 16.00                      | 21.00        |
| 5                              | 25.50                      | <b>25.50<sup>e</sup></b> | 12.75                      | <b>12.75</b> |
| 6                              | 13.50                      | 16.00                    | 31.50                      | <b>31.50</b> |
| 7                              | 29.00                      | 33.25                    | 18.50                      | 11.00        |
| 8                              | 14.50                      | 17.00                    | 13.50                      | 14.00        |
| 9                              | 20.50                      | 14.50                    | 36.75                      | 17.75        |
| 10                             | 13.50                      | 13.00                    | 42.75                      | 36.50        |
| 11                             | 17.25                      | 8.25                     | 39.50                      | 39.00        |
| 12                             | 24.50                      | 24.25                    | 9.50                       | 8.000        |
| 13                             | 20.25                      | 18.75                    | 64.25                      | 53.75        |
| 14                             | 38.50                      | 30.00                    | 63.00                      | 45.75        |
| 15                             | 22.75                      | 36.25                    | 28.50                      | <b>28.50</b> |
| 16                             | 56.25                      | 25.50                    | 27.25                      | 24.25        |
| 17                             | 13.25                      | <b>13.25</b>             | 44.25                      | <b>44.25</b> |
| 18                             | 64.25                      | 48.25                    | 12.00                      | <b>12.00</b> |
| 19                             | 18.50                      | 14.50                    | 17.00                      | 7.75         |
| 20                             | 26.75                      | <b>26.75</b>             | 9.50                       | 10.50        |
| 21                             | 55.00                      | 39.75                    | 12.75                      | 8.00         |
| 22                             | 65.50                      | <b>65.5</b>              | 8.75                       | <b>8.75</b>  |
| 23                             | 59.75                      | 43.50                    | 54.00                      | 60.75        |
| 24                             | 50.75                      | 31.00                    | 14.00                      | 15.50        |
| 25                             | 17.00                      | 14.75                    | 24.25                      | 21.75        |
| 26                             | 61.75                      | 42.50                    | 52.50                      | 66.00        |
| 27                             | 11.25                      | 11.75                    | 8.25                       | 11.50        |
| 28                             | 56.25                      | 40.00                    | 63.75                      | 50.75        |
| 29                             | 21.25                      | 11.50                    | 14.25                      | <b>14.25</b> |
| 30                             | 17.75                      | 12.25                    | 10.25                      | 7.50         |

<sup>a</sup>Volunteers treated with 2% meclozine pharmaceutical gel.

<sup>b</sup>Volunteers treated with the vehicle gel.

<sup>c</sup>A total of 60 volunteers were included and randomized into two groups of 30 volunteers.

<sup>d</sup>Michaelson's Acne Severity Index (ASI) was evaluated by counting inflammatory lesions (papules, pustules and nodules with size  $\geq 5$  mm) and non-inflammatory lesions (open and closed comedones) and calculated as follow:  $ASI = (\text{comedones} \times 0.5) + (\text{papules} \times 1) + (\text{pustules} \times 2) + (\text{nodules} \times 3)$ .

<sup>e</sup>Values in bold corresponded to the dropped-out volunteers

**Supplementary Table S4: Primer used in this study**

| <b>Name</b>   | <b>Forward</b>          | <b>Reverse</b>           |
|---------------|-------------------------|--------------------------|
| IL-1 $\beta$  | TCCTGCGTGTTGAAAGATGATAA | CAAATCGCTTTTCCATCTTCTTC  |
| CXCL8/IL-8    | TCTTGGCAGCCTTCCTGATT    | TTTCTGTGTTGGCGCAGTGT     |
| TNF- $\alpha$ | GAGCACTGAAAGCATGATCC    | CGAGAAGATGATCTGACTGCC    |
| GM-CSF        | GGAGCATGTGAATGCCATCCAG  | CTGGAGGTCAAACATTTCTGAGAT |
| GAPDH         | GCCACATCGCTCAGACAC      | GCCCAATACGACCAAATCC      |

FIGURE

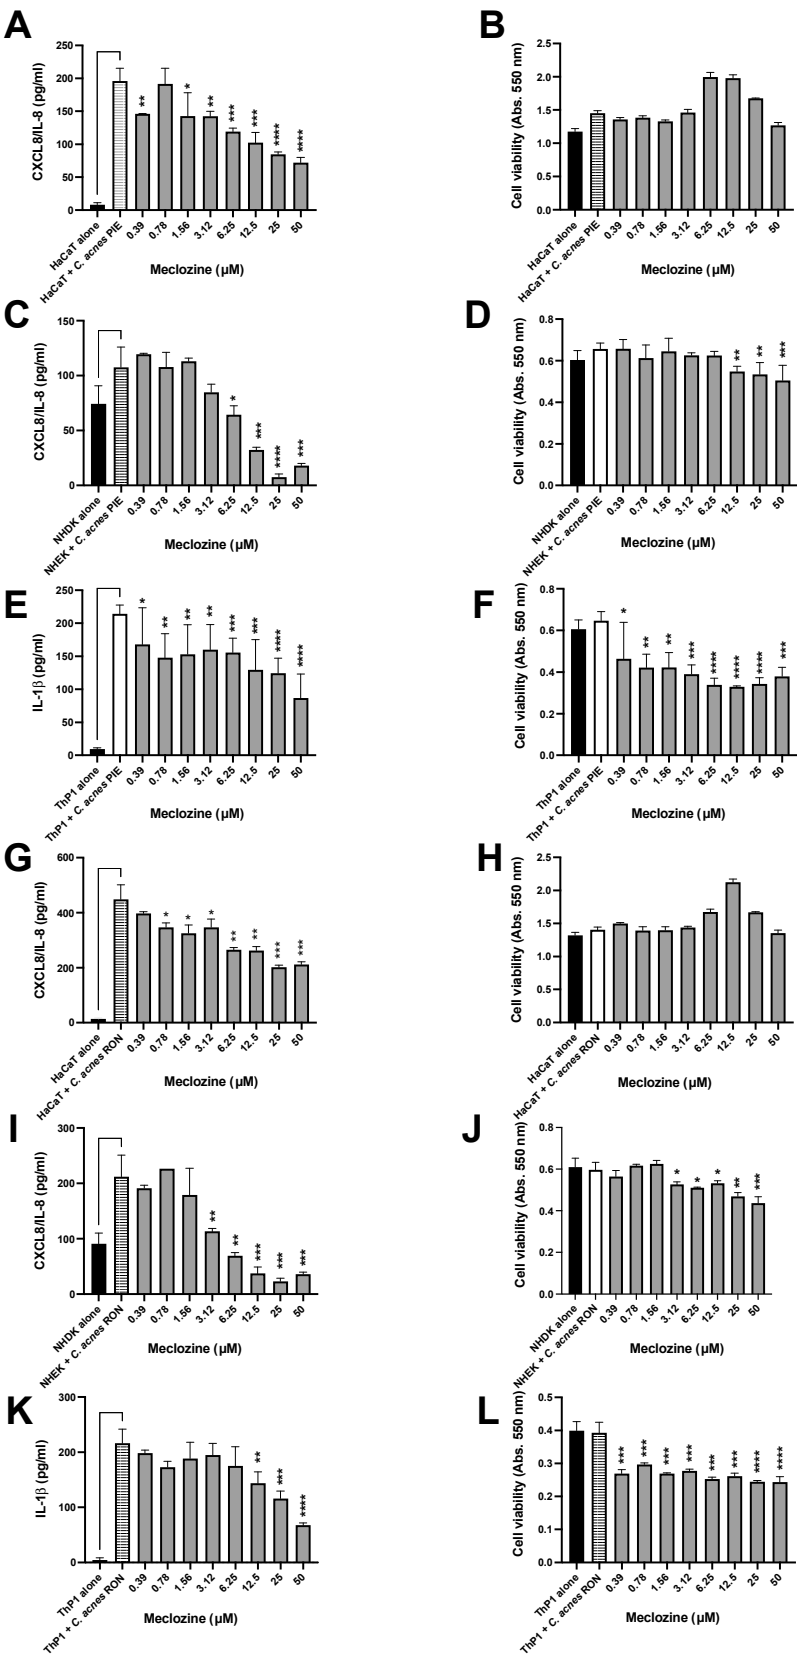

**Supplementary Figure S1:** Meclozine inhibits the CXCL8/IL-8 and the IL-1 $\beta$  productions in keratinocytes and monocytes stimulated by *C. acnes* PIE and RON strains. **(a,b,g,h)** HaCaT cell, **(c,d,i,j)** primary keratinocyte (NHDK), and **(e,f,k,l)** ThP-1 cell were incubated for 24 h with meclozine at concentrations ranging from 0.39 to 50  $\mu$ M and stimulated with *C. acnes* strain (gray bar). Controls experiments were done with untreated and unstimulated cells (black bar) and with cells stimulated with *C. acnes* only (horizontal line bar). Measurement of CXCL8/IL-8 and IL-1 $\beta$  productions were realized by ELISA and cytotoxicity was determined by the MTT assay as described in Materials and Methods. Data are means  $\pm$  S.D. of three separate experiments. Statistical significance is indicated by \* ( $P < 0.05$ ), \*\* ( $P < 0.01$ ), \*\*\* ( $P < 0.001$ ), and \*\*\*\* ( $P < 0.0001$ ), respectively.

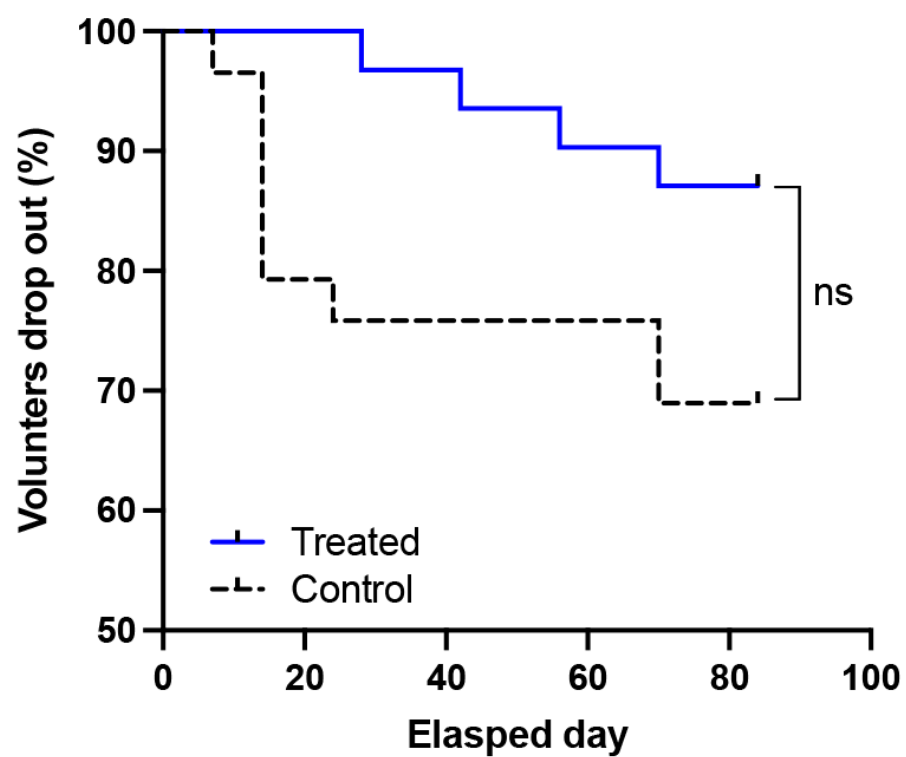

**Supplementary Figure S2:** Analysis of the drop-out volunteers during the 12-weeks study.

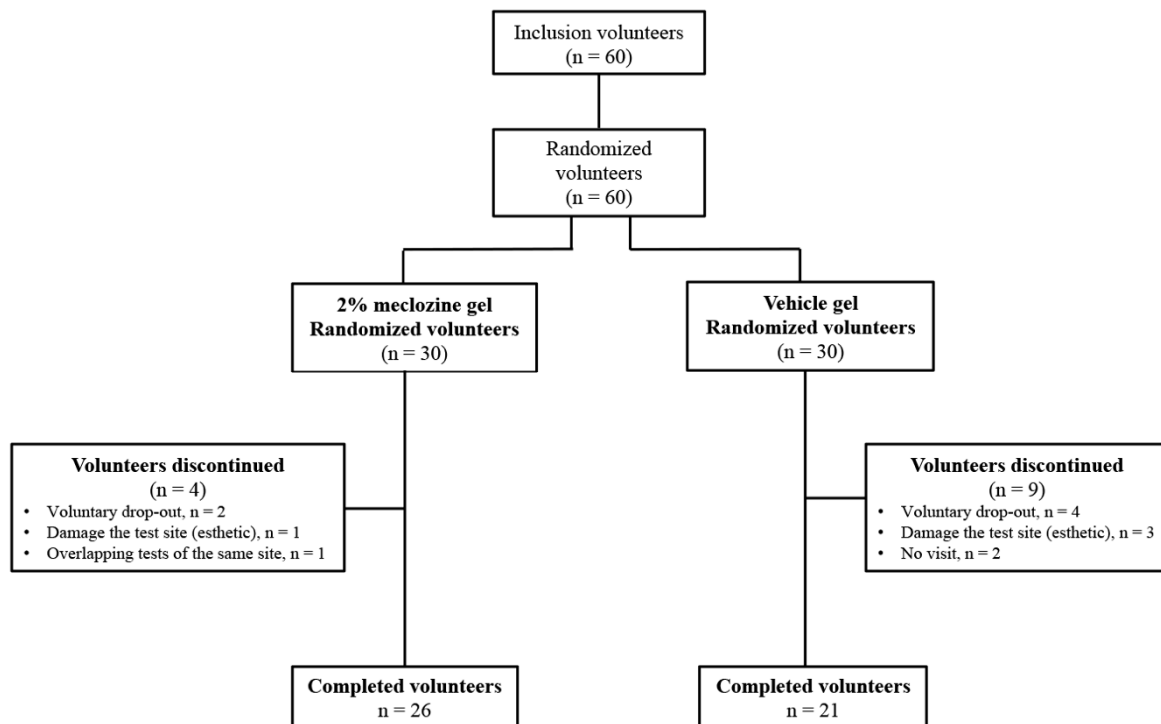

**Supplementary Figure S3:** Flow chart of study population in the clinical trial.
